# Supplementary material for: Long photocarrier lifetimes in CsPbBr 3 films deposited by a machine-learning-assisted IR-laser molecular beam epitaxy process
Source: Royal Society of Chemistry journal article supplement (doi:10.1039/d5tc03279b), 2026-01-01
Supplement: d5tc03279b1.pdf [file d5tc03279b1.pdf]

## Supplementary information

### Long Photocarrier Lifetimes in CsPbBr<sub>3</sub> Films Deposited by Machine-learning-assisted IR-Laser Molecular Beam Epitaxy

Shizuka Suzuki <sup>1</sup>, Toshihiro Sato <sup>2</sup>, Hideomi Koinuma <sup>3</sup>, Ryuzi Katoh <sup>4</sup>, and Ryota Takahashi <sup>1, \*</sup>

<sup>1</sup>. College of Engineering, Department of Electrical and Electronic Engineering, Nihon University, Fukushima, 963-8642, Japan

<sup>2</sup>. Vacuum Products, Tokyo, 187-0012, Japan

<sup>3</sup>. Smart Combinatorial Technology, Tokyo, 105-0014, Japan

<sup>4</sup>. College of Engineering, Department of Chemical Biology and Applied Chemistry, Nihon University, Fukushima, 963-8642, Japan

\* Author to whom correspondence should be addressed: [takahashi.ryota@nihon-u.ac.jp](mailto:takahashi.ryota@nihon-u.ac.jp)

### Condition A

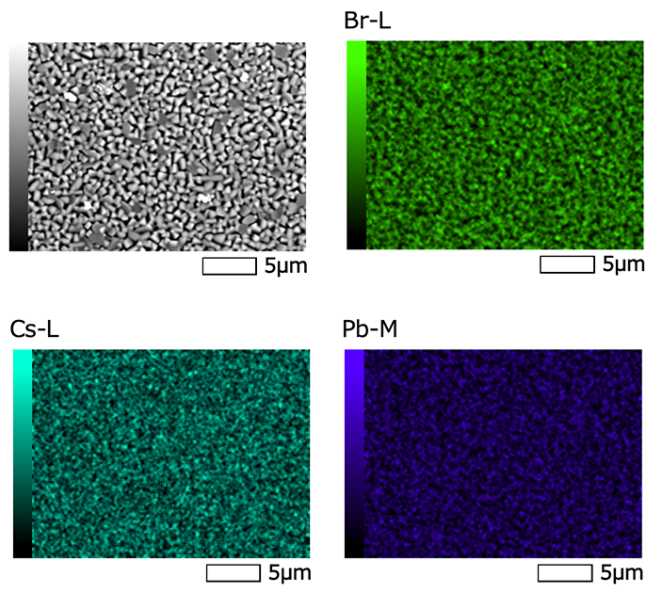

### Condition B

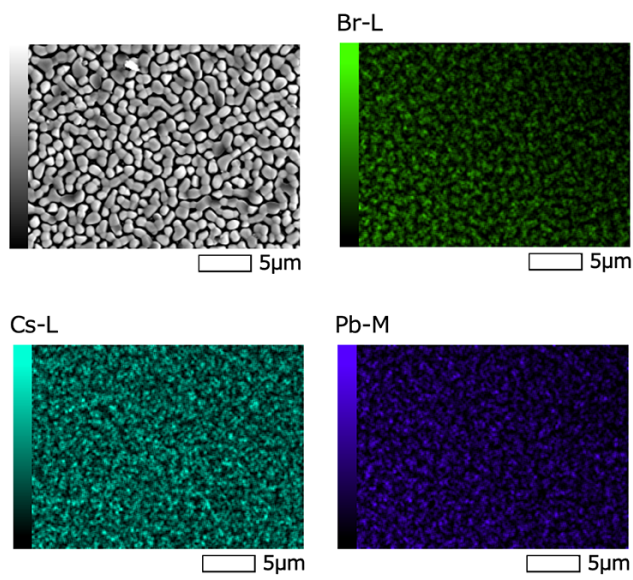

### Condition C

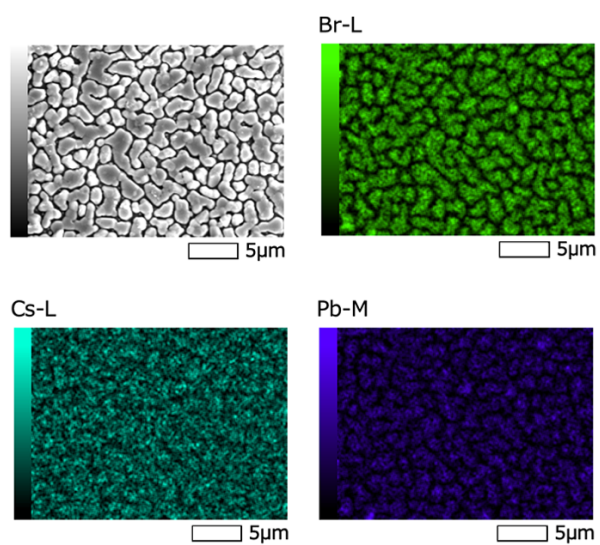

**Figure S1** : SEM-EDS mappings of CsPbBr<sub>3</sub> films grown under condition A, B, C. The Cs/Pb ratios of CsPbBr<sub>3</sub> films grown under conditions A, B, C were measured to be 0.997, 0.995, and 0.921, respectively.

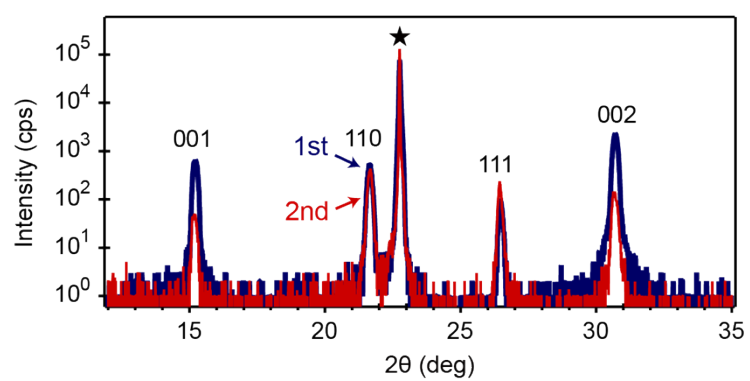

**Figure S2** : XRD patterns to investigate the reproducibility of two CsPbBr<sub>3</sub> films grown under condition A. By the deposition under the growth window, no impurity peak originated from CsPb<sub>2</sub>Br<sub>5</sub> phase were visible.

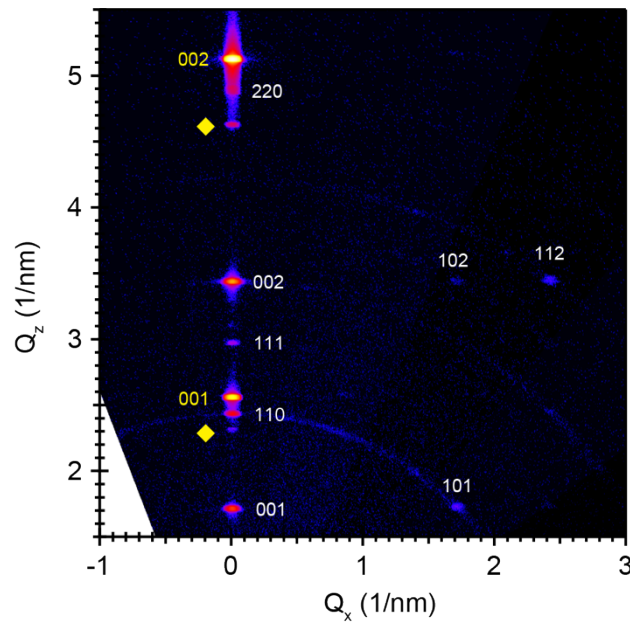

**Figure S3** : Wide-range reciprocal space mapping along the HHL direction of a CsPbBr<sub>3</sub> film grown under condition A on a SrTiO<sub>3</sub> substrate. White and yellow characters denote the reflections of the film and substrate, respectively. “◆” denotes the K<sub>β</sub> reflection of the substrate crystal.

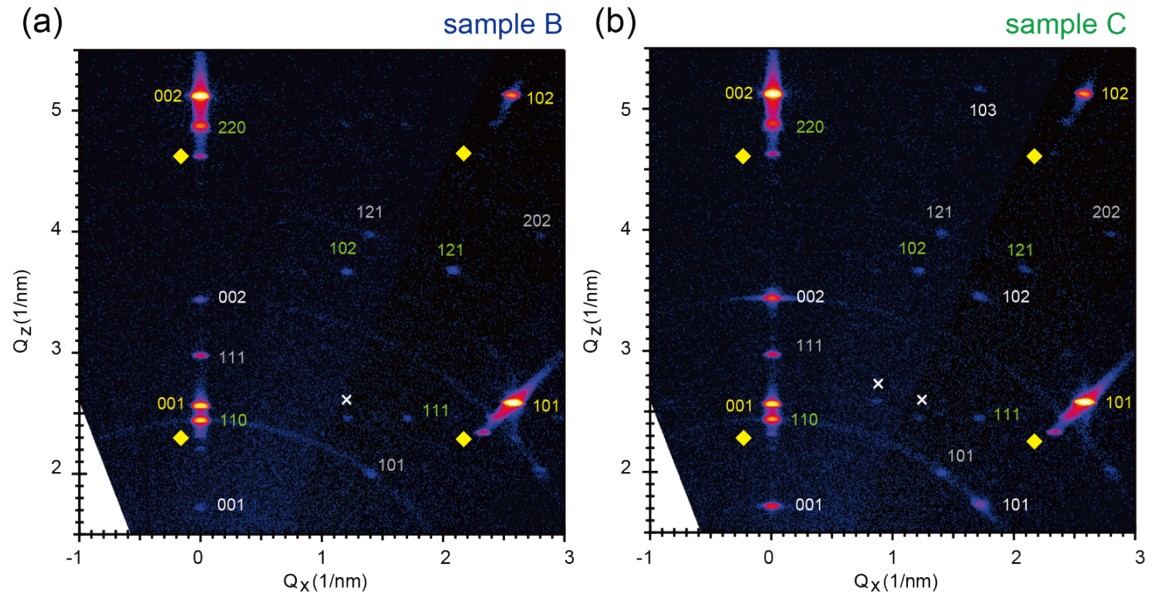

**Figure S4** : Wide-range reciprocal space mappings along the HOL direction of  $\text{CsPbBr}_3$  films grown under conditions B (a) and C (b) on  $\text{SrTiO}_3$  substrates. White, green, gray, and yellow characters denote the reflections of the c-axis, (110)-oriented, (111)-oriented  $\text{CsPbBr}_3$ , and  $\text{SrTiO}_3$  substrate, respectively. “♦” and “x” denotes the  $K_\beta$  reflection of the substrate crystal and unknown phase, respectively.

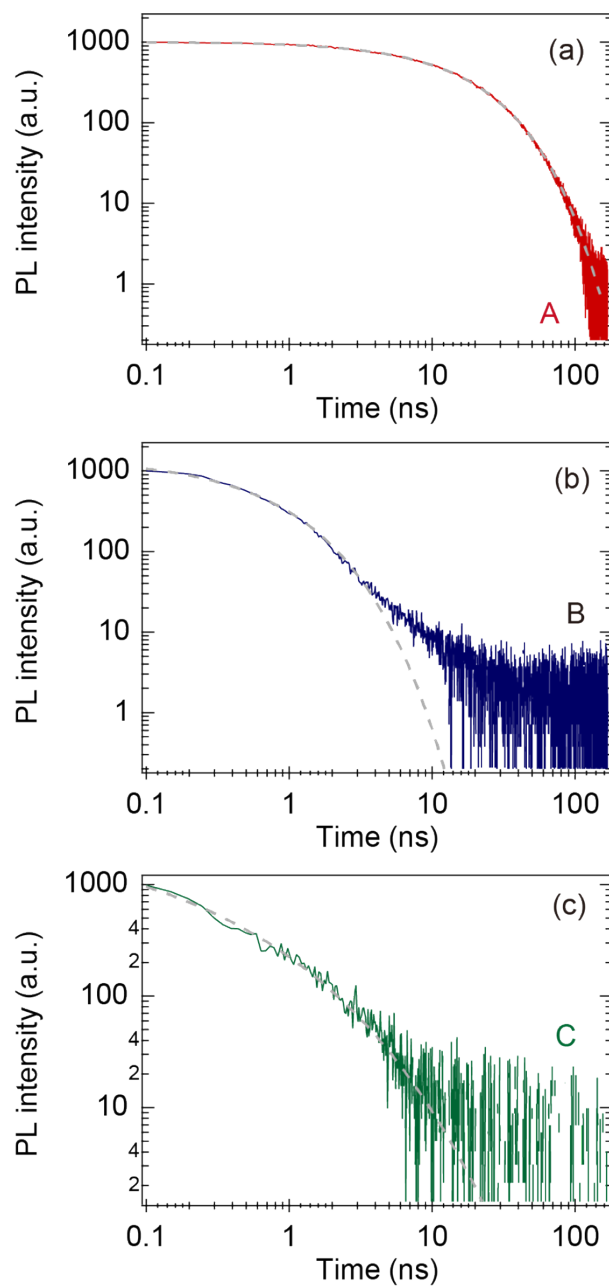

**Figure S5** : Transient TRPL profiles of a CsPbBr<sub>3</sub> film grown at conditions A (a), B (b), and C (c), respectively. The gray dotted line denotes the fitting results.

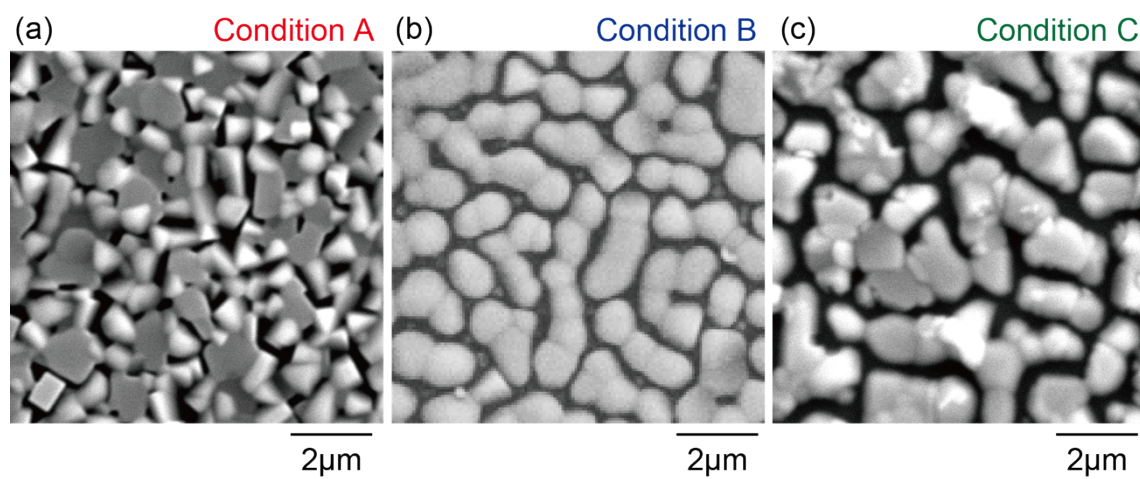

**Figure S6** : SEM images of CsPbBr<sub>3</sub> films grown under conditions A (a), B (b), and C (c).
